# Seeking Value

## Balancing Cost and Quality in Psychiatric Care

Edited by Wesley E. Sowers, M.D., and Jules M. Ranz, M.D.

Group for the Advancement of Psychiatry

Health indicators in the United States are among the worst in the developed world, even though its health care system is, by a wide margin, the most expensive in the world. It is a disparity that stems from a fragmentation of services and financial arrangements that often prioritize commercial interests over public health.

*Seeking Value: Balancing Cost and Quality in Psychiatric Care*, a comprehensive volume by the Group for the Advancement of Psychiatry's Mental Health Services Committee, examines the myriad factors that have led to the current state of health care in the United States—starting with an analysis of the meaning and history of value measurement—but it does not stop there. It offers a holistic vision for health care reform, one in which psychiatric professionals play a pivotal role.

A section on system interventions tackles traditional models of financing health care and the role of market forces as it considers broad public health strategies, from elimination of administrative waste to integration of care, that can reduce costs and improve population health, with a special emphasis on the interaction between mental and physical health.

Recognizing that these larger-scale interventions require time to bear fruit, the book also explores the ways the psychiatric profession and individual psychiatrists can contribute to a more skill-diverse, collaborative, activist, value-conscious, and visionary specialty.

Several chapters also identify public policy issues and cultural constructs that go beyond the typical role of clinicians and health care administrators, but that have the potential to impact population health in significant ways, illustrating how different choices could result in remarkable improvements in social well-being. The incorporation of healthy practices in the workplace, efforts to mitigate the impact of climate change, and the elimination of counterproductive incarceration practices all feature in this discussion.

Exhaustive in approach, the book aims to spur thought, conversation, and action to improve value in the services the psychiatric profession provides and the systems in which it operates. Its clear and compelling message will equip readers to develop an advocacy agenda that will resonate with nonmedical stakeholders and the practical strategies needed to see it realized.

# SEEKING VALUE

## Balancing Cost and Quality in PSYCHIATRIC CARE

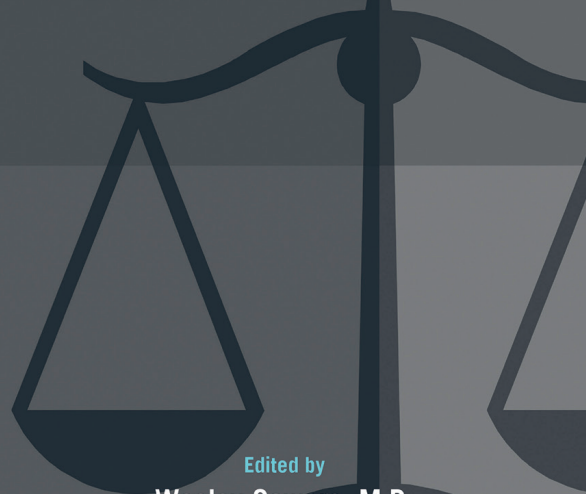

Edited by

Wesley Sowers, M.D.

Jules M. Ranz, M.D.

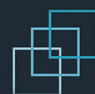

GROUP for the  
ADVANCEMENT of  
PSYCHIATRY

2021 • 643 pages • ISBN 978-0-87318-225-6 • Hardcover • \$85.00 • Item #7225

2021 • 643 pages • ISBN 978-0-87318-226-3 • eBook • \$68.00 • Item #7226

AMERICAN  
PSYCHIATRIC  
ASSOCIATION  
PUBLISHING

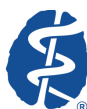

ORDER @ [www.appi.org](http://www.appi.org) | Email: [appi@psych.org](mailto:appi@psych.org) | Toll Free: 1-800-368-5777

20% Discount for American Psychiatric Association Members

25% Discount for APA Resident-Fellow Members

Follow us on  and 



Searching for  
the perfect  
psychiatric  
career?

## Let APA JobCentral help!

### Manage Your Career

- Browse hundreds of active job listings!
- Create an account to save jobs, store multiple resumes and cover letters and communicate with employers through our internal messaging system.
- Set up multiple job alerts specifying your skills, interests and location to receive e-mails when employers post jobs that match your criteria.

### Recruit for Open Positions

- Post your job in front of thousands of highly qualified psychiatrists.
- Cross promote your job listing in Psychiatric News.
- Search the anonymous resume database to find your ideal candidate.

AMERICAN  
**PSYCHIATRIC**  
ASSOCIATION

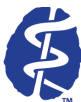

**JOBCENTRAL**  
The Career Hub for Psychiatry

[jobs.psychiatry.org](https://jobs.psychiatry.org)

# PSYCHIATRYonline

Your Destination for Lifelong Learning in Psychiatry

The one-stop resource for information on diagnosis, treatment, guidelines, the latest research, and breaking news from the field.

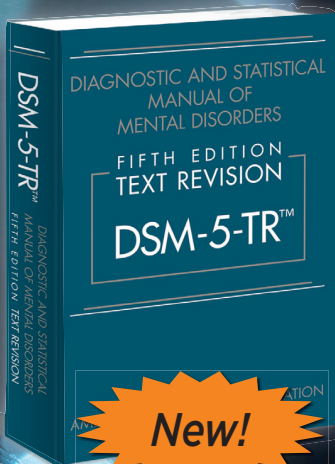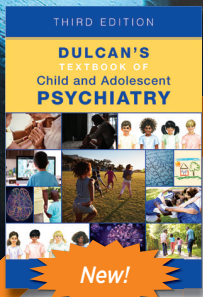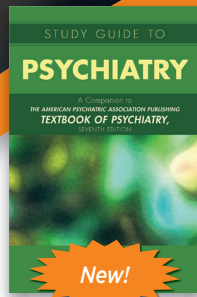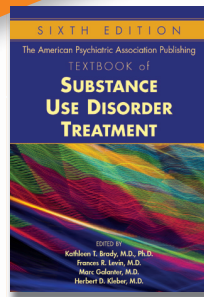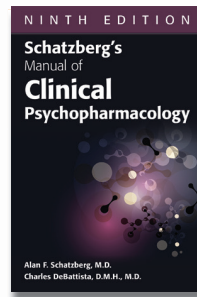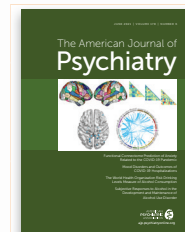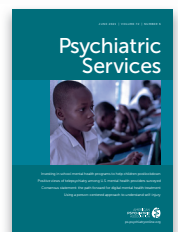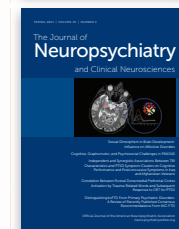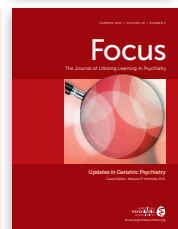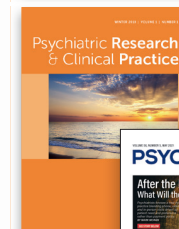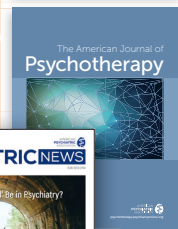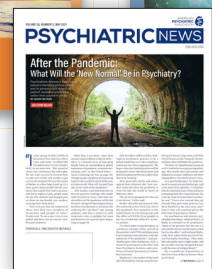

**PsychiatryOnline.org** is the platform for all American Psychiatric Association Publishing journals, *DSM-5-TR™*, and bestselling textbooks, as well as APA Practice Guidelines, and continuing medical education.

This is a one-stop resource for information on psychiatric diagnosis, treatment, guidelines, the latest research, and breaking news from the field. From a single location, users can search across all books and journals to find the most relevant content easier than ever.

Subscribe to products individually or to the DSM Select package that includes the DSM-5® library, books and select journals.

**Go to [www.appi.org](http://www.appi.org) to subscribe.**

*Institutional subscription options are available.*

For more information contact: [institutions@psych.org](mailto:institutions@psych.org);  
800-368-5777 ext. 3729

AMERICAN  
PSYCHIATRIC  
ASSOCIATION  
PUBLISHING   
[psychiatryonline.org](http://psychiatryonline.org)

# ▶ PODCASTS from APA Publishing

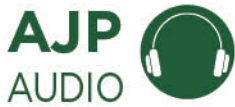

## AJP Audio

Host: Aaron van Dorn

Each episode features an in-depth interview with authors featured in that month's issue of *The American Journal of Psychiatry*.

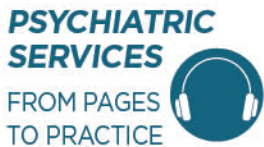

## Psychiatric Services From Pages to Practice

Hosts: Lisa Dixon, M.D., M.P.H., Editor, *Psychiatric Services*, and Josh Berezin, M.D., M.S.

Learn about the latest mental health services research published in *Psychiatric Services* and why it is relevant. Topics include community-based treatment programs, collaborative care, evidence-based treatment and service delivery, criminal and social justice, policy analysis, and more.

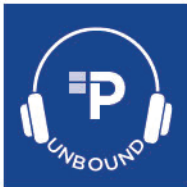

## Psychiatry Unbound

Host: Laura Roberts, M.D., M.A., Editor-in-Chief, APA Publishing Books

APA Publishing's Books podcast offers the opportunity to hear the voices behind the most prominent psychiatric scholarship in the field today. Learn about important topics in the field of psychiatry and see how our authors are making an impact in clinical settings throughout the world.

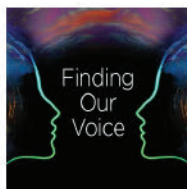

## Finding Our Voice

Host: Sanya Virani, MBBS, MPH

Finding Our Voice brings the viewpoints and opinions of the next generation of psychiatrists—including residents, fellows, and early career psychiatrists—to the forefront. Topics covered include systemic racism and social determinants.

Subscribe Today!

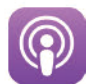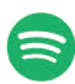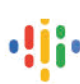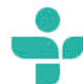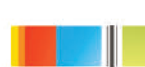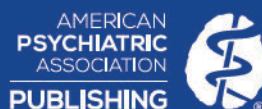

**New!**

# Diagnostic and Statistical Manual of Mental Disorders, Fifth Edition, Text Revision (DSM-5-TR™)

American Psychiatric Association

The *Diagnostic and Statistical Manual of Mental Disorders*, Fifth Edition, Text Revision (DSM-5-TR), is the most comprehensive, current, and critical resource for clinical practice available to today's mental health clinicians and researchers. DSM-5-TR includes the fully revised text and references, updated diagnostic criteria and ICD-10-CM codes since DSM-5 was published in 2013. It features a new disorder, Prolonged Grief Disorder, as well as codes for suicidal behavior available to all clinicians of any discipline without the requirement of any other diagnosis.

With contributions from over 200 subject matter experts, this updated volume boasts the most current text updates based on the scientific literature. Now in four-color and with the ability to authenticate each printed copy, DSM-5-TR provides a cohesive, updated presentation

of criteria, diagnostic codes, and text. This latest volume offers a common language for clinicians involved in the diagnosis and study of mental disorders and facilitates an objective assessment of symptom presentations across a variety of clinical settings—inpatient, outpatient, partial hospital, consultation-liaison, clinical, private practice, and primary care.

## Stay current with these important updates to DSM-5-TR™:

- Fully revised text for each disorder with updated sections on associated features, prevalence, development and course, risk and prognostic factors, culture, diagnostic markers, suicide, differential diagnosis, and more.
- Addition of Prolonged Grief Disorder (PGD) to Section II—a new disorder for diagnosis
- Over 70 modified criteria sets with helpful clarifications since publication of DSM-5
- Fully updated Introduction and Use of the Manual to guide usage and provide context for important terminology
- Considerations of the impact of racism and discrimination on mental disorders integrated into the text
- New codes to flag and monitor suicidal behavior, available to all clinicians of any discipline and without the requirement of any other diagnosis
- Fully updated ICD-10-CM codes implemented since 2013, including over 50 coding updates new to DSM-5-TR for substance intoxication and withdrawal and other disorders
- Updated and redesigned Diagnostic Classification

This manual is a valuable resource for other physicians and health professionals, including psychologists, counselors, nurses, and occupational and rehabilitation therapists, as well as social workers and forensic and legal specialists. DSM-5-TR™ is the most definitive resource for the diagnosis and classification of mental disorders.

2022 • 1,142 pages • ISBN 978-0-89042-575-6 • Hardcover • \$220.00 • Item #2575

2022 • 1,142 pages • ISBN 978-0-89042-576-3 • Paperback • \$170.00 • Item #2576

2022 • 1,142 pages • ISBN 978-0-89042-577-0 • eBook • \$136.00 • Item #2577

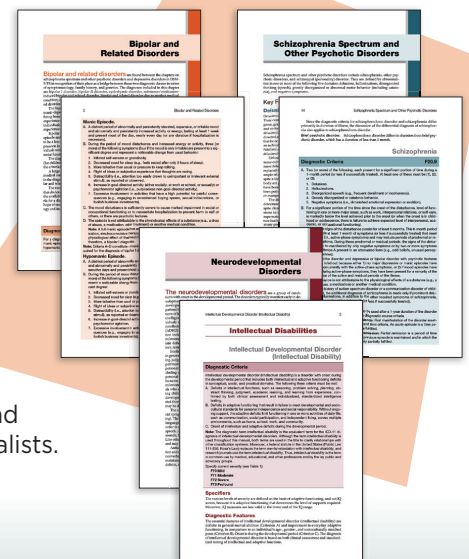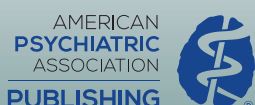

20% Discount for American Psychiatric Association Members

25% Discount for APA Resident-Fellow Members

▶ ORDER @ [www.appi.org](http://www.appi.org) | Email: [appi@psych.org](mailto:appi@psych.org) | Toll Free: 1-800-368-5777
