# Psychiatric Services

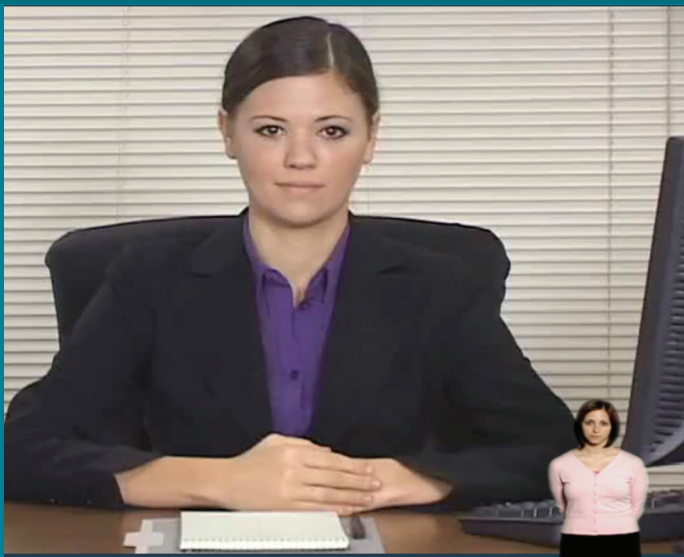

"Have you been by the construction site recently? The new store is on track to open in a month. Some of the new hires may start training before that."

Molly is trying to break the ice and start the interview off slowly so that you have a chance to relax. 🗣️

Talk Transcript Notes

Type here to find what you want to say...

**Follow-on**

- 🗣️ I can't think of a time this has happened to me
- 🗣️ I think at some point everyone has had to follow a rule like or completely agree with, but that's just part of life
- 🗣️ I can't think of a time that I've had to do this because of my beliefs or morals, I think it's important to compromise
- 🗣️ If a rule has really bothered me, I've discussed it with my manager in the past. If it's not a big deal, I just do my best to follow it
- 🗣️ Since I have strong leadership skills, I think I would be open for a change if I don't like the rules. Others who should be brave enough to do it.
- 🗣️ I follow all rules that make sense to me. If I don't like a rule, I try to avoid it.

**End the interview**

- 🗣️ I really appreciate the chance to interview; it's a great job for me, and I don't want to waste anymore of your time.

Virtual reality job interview training for people with serious mental illness

CO-MED trial: predicting treatment outcomes for adults with major depression

Racism & Mental Health Equity: Hispanic psychiatry fellowship

Personal Accounts: Bringing an inside perspective to mental health services
